# Supplementary material
Source: PubMed Central journal article supplement (PMC1691547)
Supplement: 14728785s01.pdf [file 14728785s01.pdf]

These are electronic appendices to the paper by Nagy *et al.* 2003 Multiple colonizations of Madagascar and Socotra by colubrid snakes: evidence from nuclear and mitochondrial gene phylogenies. *Proc. R. Soc. Lond. B* **270**, 2613–2621. (DOI 10.1098/rspb.2003.2547.)

Electronic appendices are refereed with the text. However, no attempt has been made to impose a uniform editorial style on the electronic appendices.

### **Electronic Appendix A: Discussion of taxon sampling and relationships within the Pseudoxyrhopiinae**

Our study included representatives of most major African colubrid lineages except natricines which showed no affinities to Malagasy taxa in previous analyses (Kraus & Brown 1998; Slowinski & Lawson 2002). Our sampling further included the two Socotran colubrid species, as well as representatives of 15 out of 18 Malagasy genera. Of the remaining three genera from Madagascar, *Pararhadinaea* and *Exallodontophis* are certainly related to *Pseudoxyrhopus* and *Heteroliodon* (Cadle 1999), and *Brygophis* is probably related to *Geodipsas* (Andreone & Raxworthy 1998), which assures us that we have not missed any major Malagasy lineage.

Within the Malagasy clade, several groupings merit to be discussed. The strongly supported lineage of *Langaha*, *Ithycyphus* and *Micropisthodon* contains diurnal arboreal snakes of a similar general habitus. Species of *Langaha* are characterized by sexually dimorphic nasal appendages, and the identification of *Ithycyphus* and *Micropisthodon* as their closest relatives allows for outgroup comparisons in studies on the evolution of this spectacular character. *Compsophis* and *Geodipsas* have been thought to be closely related previously (Glaw & Vences 1994; Ziegler *et al.* 1997). Our data confirm these assumptions. More thorough morphological studies will probably show that these two taxa are synonyms, which would result in the need of transferring all *Geodipsas* species to the genus *Compsophis* which has nomenclatural priority. Of the less well supported groupings of our trees, it is worth emphasizing the clustering of *Alluaudina* with *Geodipsas* and *Compsophis*, which agrees with hemipenial morphology (Ziegler *et al.* 1997).

#### Additional references:

- Andreone, F. & Raxworthy, C. J. 1998 The colubrid snake *Brygophis coulangesi* (Domergue 1988) rediscovered in north-eastern Madagascar. *Trop. Zool.* **11**, 249-257.
- Cadle, J. E. 1999 The dentition, systematics, and phylogeny of *Pseudoxyrhopus* and related genera from Madagascar (Serpentes: Colubridae), with description of a new species and a new genus. *Bull. Mus. Comp. Zool.* **155**, 381-443.
- Ziegler, T., Vences, M., Glaw, F. & Böhme, W. 1997 Genital morphology and systematics of *Geodipsas* Boulenger, 1896 (Reptilia: Serpentes: Colubridae), with description of a new genus. *Revue suisse Zool.* **104**, 95-114.

**Electronic Appendix B:** Taxa used for analysis, collection numbers and localities of voucher specimens and GenBank accession numbers for the three gene fragments analyzed. Subfamilial assignment of colubrids is largely given according to Zaher (2000); *Macroprotodon* being transferred to the Colubrinae and *Dromicodryas* to the Pseudoxyrhopiinae based on the molecular evidence herein. Assignment of *Prosymna* to the Colubridae seems uncertain according to our data. Museum acronyms used: CAS, California Academy of Sciences, San Francisco; FAZC, Zoological Collection of Franco Andreone, specimens to be deposited in MRSN; HLMD, Hessisches Landesmuseum Darmstadt (RA codes refer to specimen collection nos., other HLMD codes refer to the reptile tissue collection); NMW, Naturhistorisches Museum Wien (W. Mayer tissue collection no.); MRSN, Museo Regionale di Scienze Naturali, Torino; PEM, Port Elizabeth Museum, Port Elizabeth; UADBA, Université d'Antananarivo, Département de Biologie Animale; ZFMK, Zoologisches Forschungsinstitut und Museum A. Koenig, Bonn; ZSM, Zoologische Staatssammlung München.

| Species                               | Subfamily/Family  | Locality                     | Voucher                 | Accession c-mos | Accession cyt b | Accession 16S rRNA |
|---------------------------------------|-------------------|------------------------------|-------------------------|-----------------|-----------------|--------------------|
| <i>Alluaudina bellyi</i>              | Pseudoxyrhopiinae | Madagascar, Berara           | MRSN FAZC 10622         | AY187966        | AY188005        | AY188044           |
| <i>Compsophis albiventris</i>         | Pseudoxyrhopiinae | Madagascar, Mt. d'Ambre      | ZSM 497/2000            | AY187972        | AY188011        | AY188050           |
| <i>Ditypophis vivax</i>               | Pseudoxyrhopiinae | Socotra                      | HLMD RA-2972            | AY187974        | AY188013        | AY188052           |
| <i>Dromicodryas bernieri</i>          | Pseudoxyrhopiinae | Madagascar, Ifaty            | UADBA FG/MV 2000.517    | AY187975        | AY188014        | AY188053           |
| <i>Dromicodryas quadrilineatus</i>    | Pseudoxyrhopiinae | Madagascar, Sambava          | not collected/ HLMD J66 | AY187976        | AY188015        | AY188054           |
| <i>Geodipsas infralineata</i>         | Pseudoxyrhopiinae | Madagascar, Manjakatombo     | ZSM 378/2000            | AY187978        | AY188017        | AY188056           |
| <i>Heteroliodon sp.</i>               | Pseudoxyrhopiinae | Madagascar, Mt. des Français | ZSM 548/2000            | AY187979        | AY188018        | AY188057           |
| <i>Ithycyphus miniatus</i>            | Pseudoxyrhopiinae | Madagascar, Berara           | MRSN-FAZC 10680         | AY187980        | AY188019        | AY188058           |
| <i>Langaha madagascariensis</i>       | Pseudoxyrhopiinae | Madagascar (pet trade)       | ZSM 636/2000            | AY187981        | AY188020        | AY188059           |
| <i>Leioheterodon geayi</i>            | Pseudoxyrhopiinae | Madagascar, Toliara          | ZSM 630/2000            | AY187982        | AY188021        | AY188060           |
| <i>Leioheterodon madagascariensis</i> | Pseudoxyrhopiinae | Madagascar, Maromandia       | MRSN-FAZC 10621         | AY187983        | AY188022        | AY188061           |
| <i>Liophidium torquatum</i>           | Pseudoxyrhopiinae | Madagascar, Mt. d'Ambre      | not collected/ HLMD J84 | AY187984        | AY188023        | AY188062           |
| <i>Liopholidophis sexlineatus</i>     | Pseudoxyrhopiinae | Madagascar, Mandraka         | UADBA FG/MV 2000.38     | AY187985        | AY188024        | AY188063           |

| Species                                      | Subfamily/Family  | Locality                     | Voucher                  | Accession c-mos | Accession cyt b | Accession 16S rRNA |
|----------------------------------------------|-------------------|------------------------------|--------------------------|-----------------|-----------------|--------------------|
| <i>Madagascarophis colubrinus</i>            | Pseudoxyrhopiinae | Madagascar, Benavony         | ZSM 403/2000             | AY187989        | AY188028        | AY188067           |
| <i>Madagascarophis meridionalis</i>          | Pseudoxyrhopiinae | Madagascar, Ifaty            | ZSM 629/2000             | AY187988        | AY188027        | AY188066           |
| <i>Micropisthodon ochraceus</i>              | Pseudoxyrhopiinae | Madagascar, Ambato           | ZFMK 66658               | AY187991        | AY188030        | AY188069           |
| <i>Pseudoxyrhopus ambreensis</i>             | Pseudoxyrhopiinae | Madagascar, Mt. d'Ambre      | not collected/HLM D J102 | AY187996        | AY188035        | AY188074           |
| <i>Stenophis betsileanus</i>                 | Pseudoxyrhopiinae | Madagascar, Marojejy         | ZFMK 60500               | AY187998        | AY188037        | AY188076           |
| <i>Stenophis pseudogramuliceps</i>           | Pseudoxyrhopiinae | Madagascar, Mt. des Francais | ZSM 550/2000             | AY187999        | AY188038        | AY188077           |
| <i>Malpolon monspessulanus</i>               | Psammophiinae     | Greece, Polidrassi           | HLMD RA-2606             | AY187990        | AY188029        | AY188068           |
| <i>Mimophis mahfalensis madagascariensis</i> | Psammophiinae     | Madagascar, Mt Ibity         | ZSM 397/2000             | AY187992        | AY188031        | AY188070           |
| <i>Mimophis m. mahfalensis</i>               | Psammophiinae     | Madagascar, Kirindy          | not collected/HLM D J68  | AY187993        | AY188032        | AY188071           |
| <i>Psammophis lineolatus</i>                 | Psammophiinae     | Kazakhstan, Charyn Canyon    | not collected/HLM D J76  | AY187995        | AY188034        | AY188073           |
| <i>Lamprophis fuliginosus</i>                | Boodontinae       | Tanzania, Tanga Region       | CAS 168909               | AF471143        | AF471060        | AY188079           |
| <i>Pythonodipsas carinata</i>                | Boodontinae       | Namibia, Kaokoveld           | PEM R8234                | AY187997        | AY188036        | AY188075           |
| <i>Coluber dorri</i>                         | Colubrinae        | Senegal, Niokolo-Koba NP     | HLMD RA-2906             | AY188001        | AY188040        | AY188081           |
| <i>Coluber zebrinus</i>                      | Colubrinae        | Namibia, N of Warmquelle     | CAS 214764               | AY188004        | AY188043        | AY188084           |
| <i>Dispholidus typus</i>                     | Colubrinae        | South Africa, Cape Town      | HLMD RA-2974             | AY187973        | AY188012        | AY188051           |
| <i>Hemerophis socotrae</i>                   | Colubrinae        | Socotra                      | HLMD RA-2973             | AY188003        | AY188042        | AY188083           |
| <i>Lytorhynchus diadema</i>                  | Colubrinae        | Tunisia, Djébil NP           | HLMD RA-2333             | AY187986        | AY188025        | AY188064           |
| <i>Macroprotodon cucullatus</i>              | Colubrinae        | Tunisia, Bou Hedma           | HLMD RA-2974             | AY187987        | AY188026        | AY188065           |
| <i>Platyiceps rogersi</i>                    | Colubrinae        | Egypt, Sinai                 | NMW KCR2                 | AY188002        | AY188041        | AY188082           |
| <i>Prosymna visseri</i>                      | Colubrinae?       | Namibia, Sesfontein          | CAS 214753               | AY187994        | AY188033        | AY188072           |

| <b>Species</b>               | <b>Subfamily/Family</b>             | <b>Locality</b>           | <b>Voucher</b>              | <b>Accession c-mos</b> | <b>Accession cyt b</b> | <b>Accession 16S rRNA</b> |
|------------------------------|-------------------------------------|---------------------------|-----------------------------|------------------------|------------------------|---------------------------|
| <i>Telescopus fallax</i>     | Colubrinae                          | Jordan, Tasan             | not collected/<br>HLMD S90  | AY188000               | AY188039               | AY188078                  |
| <i>Aspidelaps scutatus</i>   | Bungarinae,<br>Elapidae             | NE Namibia                | not collected/<br>HLMD J128 | AY187968               | AY188007               | AY188046                  |
| <i>Boulengerina annulata</i> | Bungarinae<br>Elapidae              | Zaire (pet trade)         | HLMD RA-<br>1607            | AY187971               | AY188010               | AY188049                  |
| <i>Elapsoidea sundevalli</i> | Bungarinae<br>Elapidae              | Namibia, W of<br>Opuwo    | HLMD RA-<br>2211            | AY187977               | AY188016               | AY188055                  |
| <i>Aparallactus capensis</i> | Aparallactinae,<br>Atractaspididae  | South Africa,<br>Pretoria | not collected/<br>HLMD J156 | AY187967               | AY188006               | AY188045                  |
| <i>Atractaspis bibronii</i>  | Atractaspidinae,<br>Atractaspididae | Namibia, W of<br>Opuwo    | HLMD RA-<br>2210            | AY187969               | AY188008               | AY188047                  |
| <i>Bitis nasicornis</i>      | Viperinae,<br>Viperidae             | Zaire, Kivu               | HLMD RA-<br>2898            | AY187970               | AY188009               | AY188048                  |
| <i>Boa constrictor</i>       | Boinae, Boidae                      | unknown (pet<br>trade)    | not collected               | AF471115               | AF471036               | AY188080                  |

**Electronic Appendix C.** Consensus phylogram of 45,000 trees obtained by Bayesian inference, based on the same data set as the ML analysis in Fig. 1. Numbers are Bayesian posterior probabilities (clade credibility values). *Boa constrictor* was used as the outgroup. Taxa from Madagascar are marked by vertical black bars, taxa from Socotra are indicated by arrows.

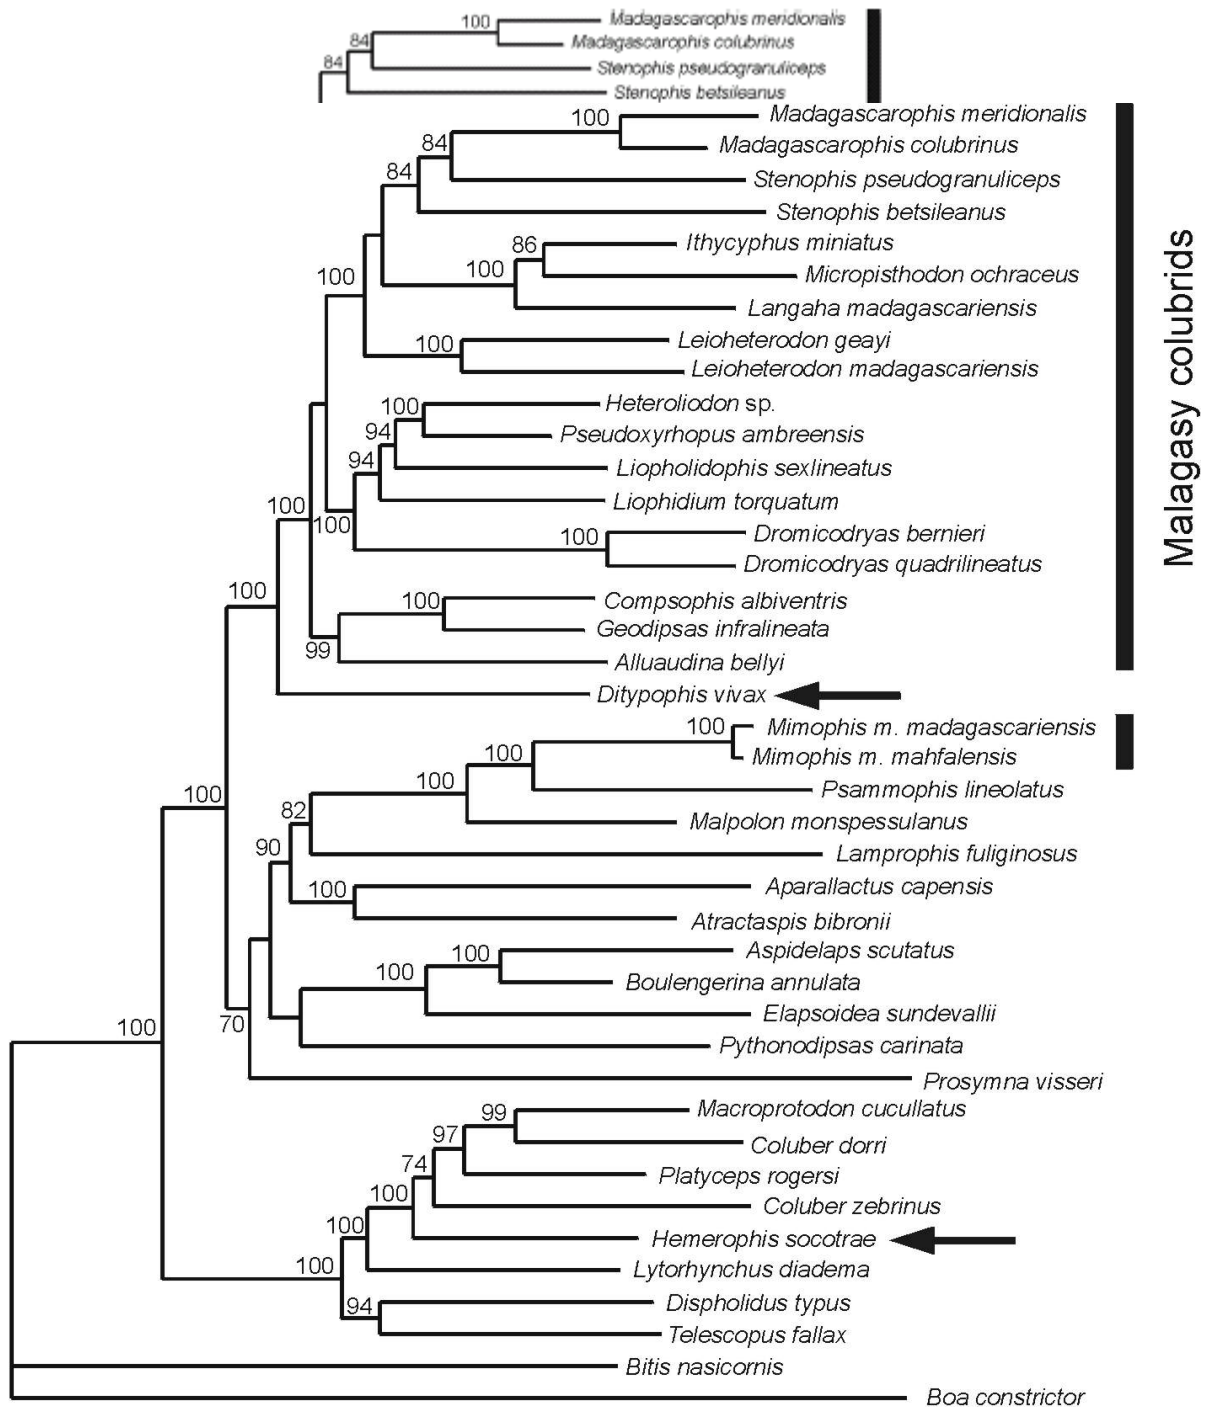

0.1 substitutions / site

## Electronic Appendix D: Saturation plots of different data partitions

Uncorrected p-distances were plotted against corrected distances (Kimura 2-parameter; Jukes-Cantor for third positions of *c-mos*). The degree of tapering of the slopes indicates saturation.

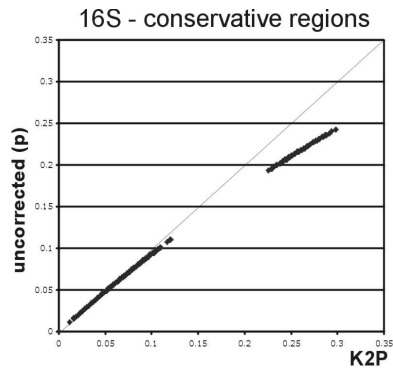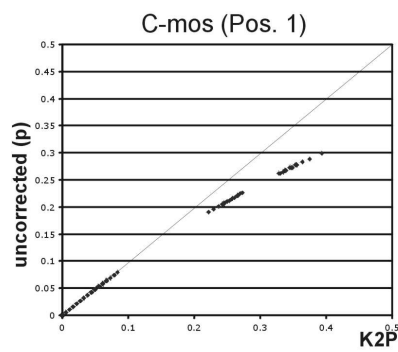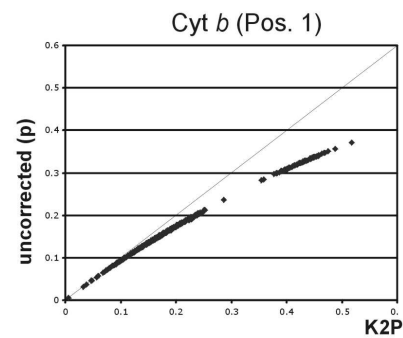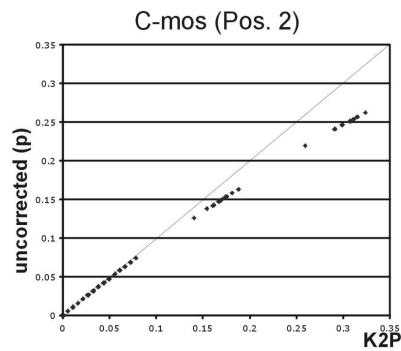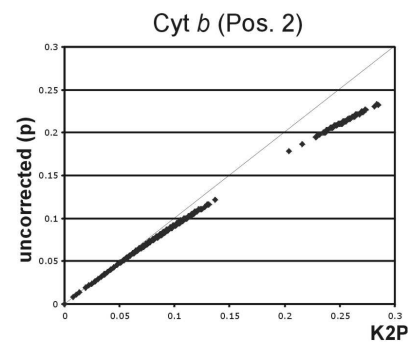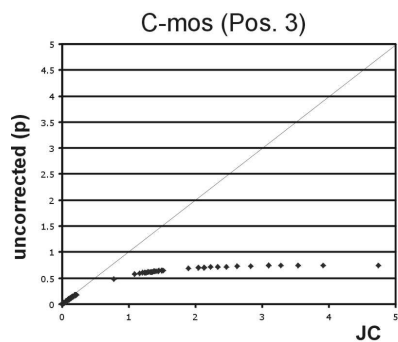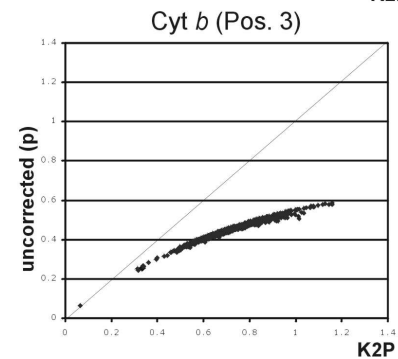

## Electronic Appendix E: Estimates of ages of divergence of crucial clades

The table shows the results of analyses after non-parametric rate smoothing (Sanderson 1997) using the r8s program (Sanderson 2002). The values are ages in MYr ago, with 95% confidence intervals (computed using the cross-validation procedure) in parentheses. Because of polytomies and lack of informative sites (in c-mos), calculations were not possible in all cases.

|                                     | Combined               | Cytochrome <i>b</i><br>(2nd Pos) | C-mos<br>(2nd Pos) | 16S rRNA<br>(conservative<br>regions) |
|-------------------------------------|------------------------|----------------------------------|--------------------|---------------------------------------|
| <i>Ditytophis</i> – Malagasy        | 30.75                  | 31.49                            | ≤ 29.48            | 46.82                                 |
| Pseudoxyrhopiinae                   | (24.32-41.05)          | (21.50-49.98)                    |                    | (26.76-75.85)                         |
| Deepest split in                    | 25.59                  | 26.22                            | ≤ 29.48            | 33.96                                 |
| Malagasy                            | (18.97-35.04)          | (17.51-43.51)                    |                    | (17.81-62.46)                         |
| Pseudoxyrhopiinae                   |                        |                                  |                    |                                       |
| <i>Mimophis</i> - <i>Psammophis</i> | 12.88                  | 8.24                             | ≤ 29.48            | 19.56                                 |
| <i>Hemerophis</i> – sister<br>clade | 21.84<br>(16.19-30.90) | 19.52                            | ---                | 26.71                                 |
